# Supplementary material
Source: Springer Nature journal article supplement (https://www.springermedizin.de/resource/supplementary/13063_2010_618_MOESM4_ESM.pdf/9618882)

# Acupoints Locations

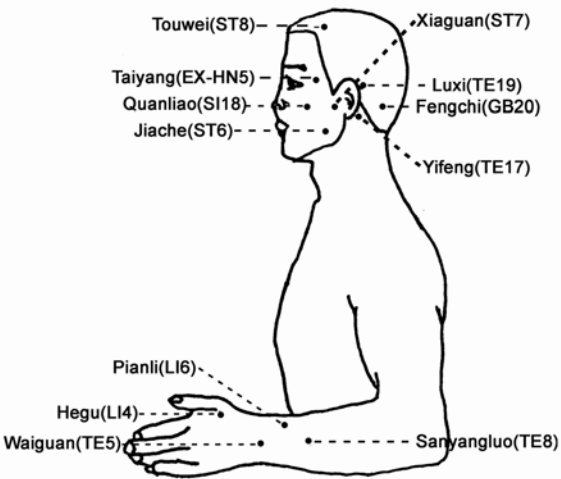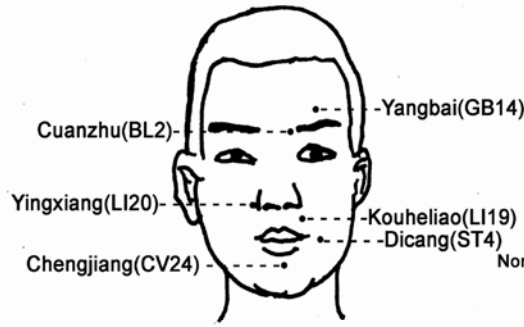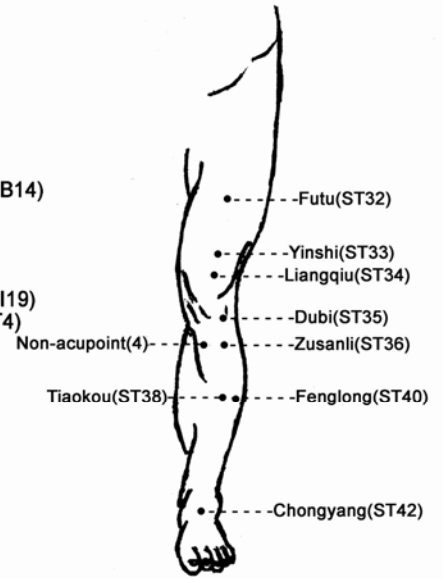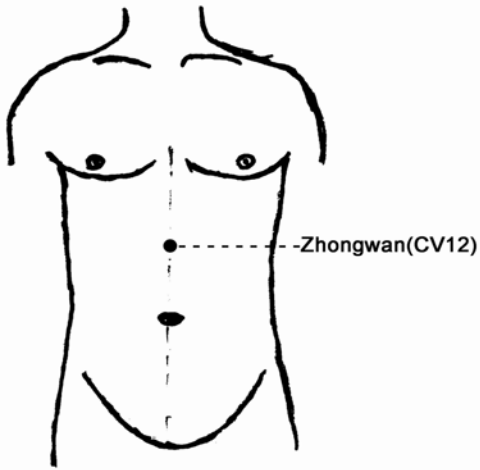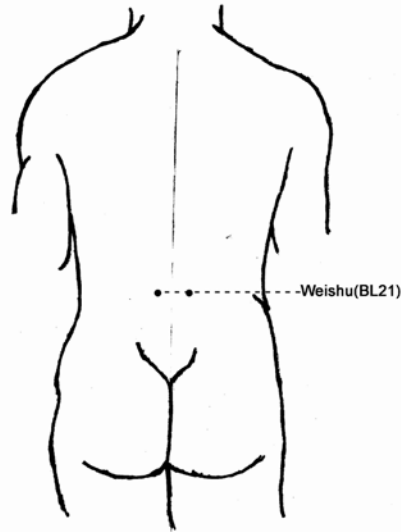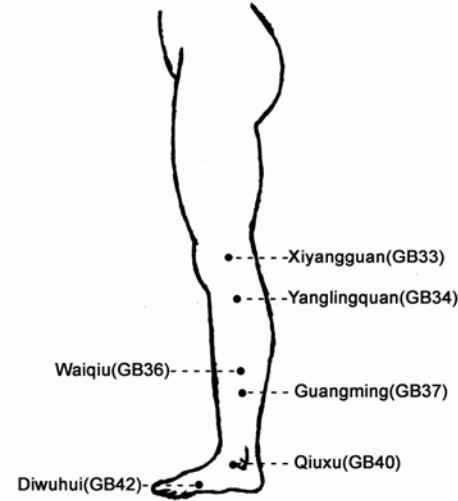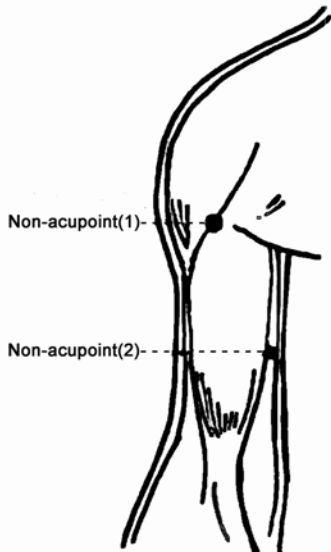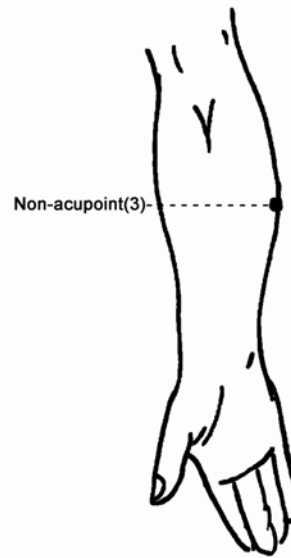

Supplement: MOESM4 [file 9618882]
